# Supplementary material
Source: Research Square preprint supplement (doi:10.21203/rs.3.rs-9790265/v1)
Supplement: Supplementary file 1 [file 557c21f809576455a95913b8.docx]

**Supplementary Material 1: Study Procedure**

**Mode of Delivery Assessment**

Spontaneous Vaginal Delivery

Caesarean Section

**APGAR Score Assessment** (at 5 minutes)

**Confirming NBU Admission**

**Assessment of Perinatal Mortality**

Immediately

After 28 days

**Enrolment**
